# Supplementary material for: Emerging Treatments for Disorders of Consciousness in Paediatric Age
Source: MDPI journal article supplement (doi:10.3390/brainsci12020198), 2022-01-31
Supplement: s1 [file s1]

# SUPPLEMENTARY MATERIAL

## Commentary: Emerging treatments for disorders of consciousness in paediatric age.

Hassna Irzan<sup>2,1</sup>, Marco Pozzi<sup>3</sup>, Nino Chikhladze<sup>4</sup>, Serghei Cebanu<sup>5</sup>, Artashes Tadevosyan<sup>6</sup>,  
Cornelia Calci<sup>5</sup>, Alexander Tsiskaridze<sup>4</sup>, Andrew Melbourne<sup>1,2</sup>, Sandra Strazzer<sup>3,7</sup>,  
Marc Modat<sup>1</sup> and Erika Molteni<sup>1\*</sup>.

### Affiliations.

1. School of Biomedical Engineering & Imaging Sciences, King's College London, London, United Kingdom.
2. Department of Medical Physics and Biomedical Engineering, University College London, United Kingdom.
3. Scientific Institute IRCCS E. Medea, Acquired Brain Injury Unit, Bosisio Parini, Italy.
4. Faculty of Medicine, Ivane Javakhishvili Tbilisi State University, Georgia.
5. Faculty of Medicine, Nicolae Testemitanu State University of Medicine and Pharmacy, Republic of Moldova.
6. Department of Public Health and Healthcare Organization, Yerevan State Medical University, Armenia.
7. Rehabilitation Service, "Usratuna" Health and Rehabilitation Centre, Juba, South Sudan.

**Supplementary Table 1. Summary of previous clinical studies of drug or regenerative treatments for DoC.**

| Drug                    | Population | Study type    | Sample size | First author | Year | Ref                                    |
|-------------------------|------------|---------------|-------------|--------------|------|----------------------------------------|
| Amantadine              | 3-18       | Retrospective | 118         | Green        | 2004 | 10.1097/01.phm.0000143400.15346.c8 [1] |
| Amantadine              | 6-18       | RDBCT, XO     | 5           | McMahon      | 2009 | 10.1097/PHM.0b013e3181a5ade3 [2]       |
| Amantadine              | 5-18       | RDBCT, XO     | 5           | Vargus-Adams | 2010 | 10.1016/j.pmrj.2009.10.010 [3]         |
| Amantadine              | 16         | Single case   | 1           | Zao          | 2020 | 10.20344/amp.11257 [4]                 |
| Amantadine, pramipexole | 12-21      | RDBCT, PA     | 10          | Patrick      | 2006 | 10.1177/08830738060210100901 [5]       |
| Dopaminergic drugs      | 8-19       | Retrospective | 10          | Patrick      | 2003 | 10.1080/0269905031000070279 [6]        |
| Methylphenidate         | 3-16       | Retrospective | 10          | Hornyak      | 1997 | 10.3109/17518429709060937 [7]          |
| Modafinil               | 15         | Single case   | 1           | Dhamapurkar  | 2017 | 10.1080/09638288.2016.1236414 [8]      |

|                                                                           |        |               |     |             |      |                                          |
|---------------------------------------------------------------------------|--------|---------------|-----|-------------|------|------------------------------------------|
| Zolpidem                                                                  | 4-17   | RDBCT, XO     | 3   | Snyman      | 2010 | 10.1055/s-0030-1269893 [9]               |
| Zolpidem                                                                  | 16     | Single case   | 1   | Appu        | 2014 | 10.1016/j.pediatrneurol.2013.11.001 [10] |
| Lorazepam,<br>methylprednisolone                                          | 5      | Single case   | 1   | Bobele      | 1999 | 10.1016/s1071-9091(99)80008-4 [11]       |
| Nerve growth factor                                                       | 4      | Single case   | 1   | Chiaretti   | 2017 | 10.1080/02699052.2017.1376760 [12]       |
| Nerve growth factor                                                       | 7      | Single case   | 1   | Chiaretti   | 2020 | 10.1007/s00381-020-04590-x [13]          |
| Autologous bone<br>marrow derived<br>mononuclear cells<br>transplantation | 2-6    | Prospective   | 5   | Liem        | 2020 | 10.3389/fped.2020.00564 [14]             |
| Cord blood cells<br>transplantation                                       | 1      | Single case   | 1   | Jozwiak     | 2010 | 10.3727/215517910X536618 [15]            |
| Cord blood cells<br>transplantation                                       | 3      | Single case   | 1   | Jensen      | 2013 | 10.1155/2013/951827 [16]                 |
| Amantadine                                                                | Adults | Single case   | 1   | Schnakers   | 2008 | 10.1136/jnnp.2007.124099 [43]            |
| Amantadine                                                                | Adults | RDBCT, PA     | 184 | Giacino     | 2012 | 10.1056/NEJMoa1102609 [17]               |
| Amantadine                                                                | Adults | Single case   | 1   | Estraneo    | 2015 | 10.1007/s00415-015-7771-y [18]           |
| Amantadine                                                                | Adults | Prospective   | 7   | Gao         | 2020 | 10.1080/02699052.2020.1780315 [19]       |
| Amantadine                                                                | Adults | ?             | 142 | Kondratieva | 2020 | 10.17116/jnevro2020120121102 [44]        |
| Amantadine<br>+ Cerebrolysin                                              | Adults | Retrospective | 84  | Lee         | 2020 | 10.2340/16501977-2654 [20]               |
| Amantadine + TMS                                                          | Adults | Prospective   | 4   | Bender Pape | 2020 | 10.1097/HTR.0000000000000634 [21]        |
| Bromocriptine                                                             | Adults | Retrospective | 5   | Passler     | 2001 | 10.1053/apmr.2001.20831 [22]             |
| Levodopa                                                                  | Adults | Retrospective | 5   | Matsuda     | 2005 | 10.1080/09602010443000588 [23]           |
| Levodopa                                                                  | Adults | Prospective   | 7   | Ugoya       | 2010 | 10.1097/WNF.0b013e3182011070 [24]        |
| Apomorphine                                                               | Adults | Single case   | 1   | Fridman     | 2009 | 10.1080/02699050802649662 [25]           |
| Apomorphine                                                               | Adults | Prospective   | 8   | Fridman     | 2010 | 10.3109/02699051003610433 [26]           |
| Selegiline                                                                | Adults | Prospective   | 6   | Masotta     | 2018 | 10.1017/cjn.2018.315 [27]                |
| Methylphenidate                                                           | Adults | Retrospective | 22  | Martin      | 2007 | 10.1097/PHM.0b013e3181154a84 [28]        |
| Psychostimulants                                                          | Adults | Retrospective | 115 | Herrold     | 2014 | 10.1155/2014/964578 [29]                 |
| Psychostimulants                                                          | Adults | Retrospective | 48  | Barra       | 2020 | 10.1177/0885066619841603 [30]            |

|                            |        |                                  |     |             |      |                                                                                                                          |
|----------------------------|--------|----------------------------------|-----|-------------|------|--------------------------------------------------------------------------------------------------------------------------|
| Desipramine, protriptyline | Adults | Retrospective                    | 8   | Wroblewski  | 1993 | 10.3109/02699059309034962 [31]                                                                                           |
| Amitriptyline              | Adults | Retrospective                    | 3   | Reinhard    | 1996 | 10.1016/s0003-9993(96)90225-7 [32]                                                                                       |
| Zolpidem                   | Adults | Prospective                      | 15  | Whyte       | 2009 | 10.1097/PHM.0b013e3181a0e3a0 [33]                                                                                        |
| Zolpidem                   | Adults | Prospective                      | 16  | Machado     | 2014 | 10.2174/13816128113196660646 [34]                                                                                        |
| Zolpidem                   | Adults | RDBCT, XO, single administration | 84  | Whyte       | 2014 | 10.1097/PHM.0000000000000069 [19]                                                                                        |
| Zolpidem                   | Adults | Single case                      | 1   | Calabrò     | 2015 | 10.1111/pcn.12215 [35]                                                                                                   |
| Zolpidem                   | Adults | Single case                      | 1   | Delargy     | 2019 | 10.1080/02699052.2018.1537008 [36]                                                                                       |
| Zolpidem                   | Adults | Single case                      | 1   | Sayadnasiri | 2019 | 10.1097/WNF.0000000000000362 [37]                                                                                        |
| Zolpidem, Lorazepam        | Adults | Retrospective                    | 146 | Zhang       | 2021 | 10.3390/brainsci11060726 [38]                                                                                            |
| Midazolam                  | Adults | Single case                      | 1   | Carboncini  | 2011 | 10.3233/RNN-140426 [39]                                                                                                  |
| Midazolam                  | Adults | Single case                      | 1   | Carboncini  | 2014 | 10.3233/RNN-140426 [40]                                                                                                  |
| Baclofen                   | Adults | Prospective                      | 8   | Margetis    | 2014 | 10.1111/ner.12147 [41]                                                                                                   |
| Baclofen                   | Adults | Retrospective                    | 5   | Sarà        | 2009 | 10.1016/j.apmr.2009.01.012 [42]                                                                                          |
| Ziconotide                 | Adults | Single case                      | 1   | Lanzillo    | 2016 | EJPRM 2016;52(2):263-6 [45]                                                                                              |
| Modafinil                  | Adults | Retrospective                    | 24  | Dhamapurkar | 2017 | 10.1080/09638288.2016.1236414 [8]                                                                                        |
| Modafinil                  | Adults | Single case                      | 1   | Formica     | 2017 | 10.5664/jcsm.6854 [43]                                                                                                   |
| Sertraline                 | Adults | Retrospective                    | 35  | Danner      | 2020 | <a href="https://doi.org/10.37191/Mapsci-2582-4333-2(3)-037">https://doi.org/10.37191/Mapsci-2582-4333-2(3)-037</a> [42] |

#### Bibliography:

1. Green, L.B.; Hornyak, J.E.; Hurvitz, E.A. Amantadine in Pediatric Patients with Traumatic Brain Injury: A Retrospective, Case-Controlled Study. *American Journal of Physical Medicine and Rehabilitation* **2004**, *83*, 893–897, doi:10.1097/01.PHM.0000143400.15346.C8.
2. McMahon, M.A.; Vargus-Adams, J.N.; Michaud, L.J.; Bean, J. Effects of Amantadine in Children with Impaired Consciousness Caused by Acquired Brain Injury: A Pilot Study. *American Journal of Physical Medicine and Rehabilitation* **2009**, *88*, 525–532, doi:10.1097/PHM.0b013e3181a5ade3.

3. Vargus-Adams, J.N.; McMahon, M.A.; Michaud, L.J.; Bean, J.; Vinks, A.A. Pharmacokinetics of Amantadine in Children With Impaired Consciousness Due to Acquired Brain Injury: Preliminary Findings Using a Sparse-Sampling Technique. *PM and R* **2010**, *2*, 37–42, doi:10.1016/j.pmrj.2009.10.010.
4. Almeida, A.F.; Beça, G.; Nunes, R.; Ana, Z.Ã.O. From Vegetative State to Participation: Amantadine As a Trigger of the Rehabilitation Program. *Acta Medica Portuguesa* **2020**, *33*, 604–609, doi:10.20344/amp.11257.
5. Patrick, P.D.; Blackman, J.A.; Mabry, J.L.; Buck, M.L.; Gurka, M.J.; Conaway, M.R. Dopamine Agonist Therapy in Low-Response Children Following Traumatic Brain Injury. *Journal of Child Neurology* **2006**, *21*, 879–885, doi:10.1177/08830738060210100901.
6. Patrick, P.D.; Buck, M.L.; Conaway, M.R.; Blackman, J.A. The Use of Dopamine Enhancing Medications with Children in Low Response States Following Brain Injury. *Brain Injury* **2003**, *17*, 497–506, doi:10.1080/0269905031000070279.
7. Hornyak, J.E.; Nelson, V.S.; Hurvitz, E.A. The Use of Methylphenidate in Paediatric Traumatic Brain Injury. *Developmental Neurorehabilitation* **1997**, *1*, 15–17, doi:10.3109/17518429709060937.
8. Dhamapurkar, S.K.; Wilson, B.A.; Rose, A.; Watson, P.; Shiel, A. Does Modafinil Improve the Level of Consciousness for People with a Prolonged Disorder of Consciousness? A Retrospective Pilot Study. *Disability and Rehabilitation* **2017**, *39*, 2633–2639, doi:10.1080/09638288.2016.1236414.
9. Snyman, N.; Egan, J.R.; London, K.; Howman-Giles, R.; Gill, D.; Gillis, J.; Scheinberg, A. Zolpidem for Persistent Vegetative State - A Placebo-Controlled Trial in Pediatrics. *Neuropediatrics* **2010**, *41*, 223–227, doi:10.1055/s-0030-1269893.
10. Appu, M.; Noetzel, M. Clinically Significant Response to Zolpidem in Disorders of Consciousness Secondary to Anti-N-Methyl-d-Aspartate Receptor Encephalitis in a Teenager: A Case Report. *Pediatric Neurology* **2014**, *50*, 262–264, doi:10.1016/j.pediatrneurol.2013.11.001.
11. Bobele, G.B.; Bale, J. Subacute Encephalopathy in a 5-Year-Old Boy. *Seminars in Pediatric Neurology* **1999**, *6*, 168–172, doi:10.1016/S1071-9091(99)80008-4.
12. Chiaretti, A.; Conti, G.; Falsini, B.; Buonsenso, D.; Crasti, M.; Manni, L.; Soligo, M.; Fantacci, C.; Genovese, O.; Calcagni, M.L.; et al. Intranasal Nerve Growth Factor Administration Improves Cerebral Functions in a Child with Severe Traumatic Brain Injury: A Case Report. *Brain Injury* **2017**, *31*, 1538–1547, doi:10.1080/02699052.2017.1376760.
13. Chiaretti, A.; Eftimiadi, G.; Buonsenso, D.; Rendeli, C.; Staccioli, S.; Conti, G. Intranasal Nerve Growth Factor Administration Improves Neurological Outcome after GBS Meningitis. *Child's Nervous System* **2020**, *36*, 2083–2088, doi:10.1007/s00381-020-04590-x.
14. Liem, N.T.; Chinh, V.D.; Phuong, D.T.M.; Van Doan, N.; Forsyth, N.R.; Heke, M.; Thi, P.A.N.; Nguyen, X.H. Outcomes of Bone Marrow-Derived Mononuclear Cell Transplantation for Patients in Persistent Vegetative State After Drowning: Report of Five Cases. *Frontiers in Pediatrics* **2020**, *8*, 1–10, doi:10.3389/fped.2020.00564.
15. Jozwiak, S.; Habich, A.; Kotulska, K.; Sarnowska, A.; Kropiwnicki, T.; Janowski, M.; Jurkiewicz, E.; Lukomska, B.; Kmiec, T.; Walecki, J.; et al. Intracerebroventricular Transplantation of Cord Blood-Derived Neural Progenitors in a Child with Severe Global Brain Ischemic Injury. *Cell Medicine* **2010**, *1*, 71–80, doi:10.3727/215517910x536618.

16. Jensen, A.; Hamelmann, E. First Autologous Cell Therapy of Cerebral Palsy Caused by Hypoxic-Ischemic Brain Damage in a Child after Cardiac Arrest—Individual Treatment with Cord Blood. *Case Reports in Transplantation* **2013**, *2013*, 1–6, doi:10.1155/2013/951827.
17. Giacino, J.T.; Whyte, J.; Bagiella, E.; Kalmar, K.; Childs, N.; Khademi, A.; Eifert, B.; Long, D.; Katz, D.I.; Cho, S.; et al. Placebo-Controlled Trial of Amantadine for Severe Traumatic Brain Injury. *Survey of Anesthesiology* **2013**, *57*, 216–217, doi:10.1097/01.sa.0000433227.82776.07.
18. Estraneo, A.; Pascarella, A.; Moretta, P.; Loreto, V.; Trojano, L. Clinical and Electroencephalographic on–off Effect of Amantadine in Chronic Non-Traumatic Minimally Conscious State. *Journal of Neurology* **2015**, *262*, 1584–1586, doi:10.1007/s00415-015-7771-y.
19. Snyman, N.; Egan, J.R.; London, K.; Howman-Giles, R.; Gill, D.; Gillis, J.; Scheinberg, A.; Whyte, J.; Rajan, R.; Rosenbaum, A.; et al. Zolpidem and Restoration of Consciousness. *American Journal of Physical Medicine and Rehabilitation* **2014**, *41*, 223–227, doi:10.1097/PHM.000000000000069.
20. Lee, S.; Lee, H.H.; Lee, Y.; Lee, J. Additive Effect of Cerebrolysin and Amantadine on Disorders of Consciousness Secondary to Acquired Brain Injury: A Retrospective Case-Control Study. *Journal of rehabilitation medicine* **2020**, *52*, jrm00025, doi:10.2340/16501977-2654.
21. Bender Pape, T.L.; Herrold, A.A.; Livengood, S.L.; Guernon, A.; Weaver, J.A.; Higgins, J.P.; Rosenow, J.M.; Walsh, E.; Bhaumik, R.; Pacheco, M.; et al. A Pilot Trial Examining the Merits of Combining Amantadine and Repetitive Transcranial Magnetic Stimulation as an Intervention for Persons with Disordered Consciousness after TBI. *Journal of Head Trauma Rehabilitation* **2020**, *35*, 371–387, doi:10.1097/HTR.0000000000000634.
22. Passler, M.A.; Riggs, R. V. Positive Outcomes in Traumatic Brain Injury-Vegetative State: Patients Treated with Bromocriptine. *Archives of Physical Medicine and Rehabilitation* **2001**, *82*, 311–315, doi:10.1053/apmr.2001.20831.
23. Matsuda, W.; Komatsu, Y.; Yanaka, K.; Matsumura, A. Levodopa Treatment for Patients in Persistent Vegetative or Minimally Conscious States. *Neuropsychological Rehabilitation* **2005**, *15*, 414–427, doi:10.1080/09602010443000588.
24. Ugoya, S.O.; Akinyemi, R.O. The Place of L-Dopa/Carbidopa in Persistent Vegetative State. *Clinical Neuropharmacology* **2010**, *33*, 279–284, doi:10.1097/WNF.0b013e3182011070.
25. Fridman, E.A.; Calvar, J.; Bonetto, M.; Gamzu, E.; Krimchansky, B.Z.; Meli, F.; Leiguarda, R.C.; Zafonte, R. Fast Awakening from Minimally Conscious State with Apomorphine. *Brain Injury* **2009**, *23*, 172–177, doi:10.1080/02699050802649662.
26. Fridman, E.A.; Krimchansky, B.Z.; Bonetto, M.; Galperin, T.; Gamzu, E.R.; Leiguarda, R.C.; Zafonte, R. Continuous Subcutaneous Apomorphine for Severe Disorders of Consciousness after Traumatic Brain Injury. *Brain Injury* **2010**, *24*, 636–641, doi:10.3109/02699051003610433.
27. Masotta, O.; Trojano, L.; Loreto, V.; Moretta, P.; Estraneo, A. Selegiline in Patients With Disorder of Consciousness: An Open Pilot Study. *Canadian Journal of Neurological Sciences* **2018**, *45*, 688–691, doi:10.1017/cjn.2018.315.
28. Martin, R.T.; Whyte, J. The Effects of Methylphenidate on Command Following and Yes/No Communication in Persons with Severe Disorders of Consciousness: A Meta-Analysis of n-of-1 Studies. *American Journal of Physical Medicine and Rehabilitation* **2007**, *86*, 613–620, doi:10.1097/PHM.0b013e3181154a84.

29. Herrold, A.A.; Pape, T.L.B.; Guernon, A.; Mallinson, T.; Collins, E.; Jordan, N. Prescribing Multiple Neurostimulants during Rehabilitation for Severe Brain Injury. *Scientific World Journal* **2014**, *2014*, doi:10.1155/2014/964578.
30. Barra, M.E.; Izzy, S.; Sarro-Schwartz, A.; Hirschberg, R.E.; Mazwi, N.; Edlow, B.L. Stimulant Therapy in Acute Traumatic Brain Injury: Prescribing Patterns and Adverse Event Rates at 2 Level 1 Trauma Centers. *Journal of Intensive Care Medicine* **2020**, *35*, 1196–1202, doi:10.1177/0885066619841603.
31. Wroblewski, B.; Glenn, M.B.; Cornblatt, R.; Joseph, A.B.; Suduikis, S. Protriptyline as an Alternative Stimulant Medication in Patients with Brain Injury: A Series of Case Reports. *Brain Injury* **1993**, *7*, 353–362, doi:10.3109/02699059309034962.
32. Reinhard, D.L.; Whyte, J.; Sandel, M.E. Improved Arousal and Initiation Following Tricyclic Antidepressant Use in Severe Brain Injury. *Archives of Physical Medicine and Rehabilitation* **1996**, *77*, 80–83, doi:10.1016/S0003-9993(96)90225-7.
33. Whyte, J.; Myers, R. Incidence of Clinically Significant Responses to Zolpidem among Patients with Disorders of Consciousness: A Preliminary Placebo Controlled Trial. *American Journal of Physical Medicine and Rehabilitation* **2009**, *88*, 410–418, doi:10.1097/PHM.0b013e3181a0e3a0.
34. Machado, C.; Estévez, M.; Rodríguez, R.; Pérez-Nellar, J.; Chinchilla, M.; DeFina, P.; Leisman, G.; Carrick, F.R.; Melillo, R.; Schiavi, A.; et al. Zolpidem Arousing Effect in Persistent Vegetative State Patients: Autonomic, EEG and Behavioral Assessment. *Current pharmaceutical design* **2014**, *20*, 4185-4202.
35. Wysokiński, A.; Kolińska, J. Rapidly Developing and Self-Limiting Eosinophilia Associated with Clozapine. *Psychiatry and Clinical Neurosciences* **2015**, *69*, 122, doi:10.1111/pcn.12208.
36. Delargy, M.; O'Connor, R.; McCann, A.; Galligan, I.; Cronin, H.; Gray, D.; O'Toole, C. An Analysis of the Effects of Using Zolpidem and an Innovative Multimodal Interdisciplinary Team Approach in Prolonged Disorders of Consciousness (PDOC). *Brain Injury* **2019**, *33*, 242–248, doi:10.1080/02699052.2018.1537008.
37. Sayadnasiri, M.; Rezvani, F. Treatment of Catatonia in Frontotemporal Dementia: A Lesson from Zolpidem Test. *Clinical Neuropharmacology* **2019**, *42*, 186–187, doi:10.1097/WNF.0000000000000362.
38. Zhang, B.; O'Brien, K.; Won, W.; Li, S. A Retrospective Analysis on Clinical Practice-Based Approaches Using Zolpidem and Lorazepam in Disorders of Consciousness. *Brain Sciences* **2021**, *11*, doi:10.3390/brainsci11060726.
39. Carboncini, M.C.; Piarulli, A.; Virgillito, A.; Arrighi, P.; Andre, P.; Tomaiuolo, F.; Frisoli, A.; Bergamasco, M.; Rossi, B.; Bonfiglio, L. A Case of Post-Traumatic Minimally Conscious State Reversed by Midazolam: Clinical Aspects and Neurophysiological Correlates. *Restorative Neurology and Neuroscience* **2014**, *32*, doi:10.3233/RNN-140426.
40. Carboncini, M.C.; Piarulli, A.; Virgillito, A.; Arrighi, P.; Andre, P.; Tomaiuolo, F.; Frisoli, A.; Bergamasco, M.; Rossi, B.; Bonfiglio, L. A Case of Post-Traumatic Minimally Conscious State Reversed by Midazolam: Clinical Aspects and Neurophysiological Correlates. *Restorative Neurology and Neuroscience* **2014**, *32*, 767–787, doi:10.3233/RNN-140426.
41. Margetis, K.; Korfiatis, S.I.; Gatzonis, S.; Boutos, N.; Stranjalis, G.; Boviatsis, E.; Sakas, D.E. Intrathecal Baclofen Associated with Improvement of Consciousness Disorders in Spasticity Patients. *Neuromodulation* **2014**, *17*, 699–704, doi:10.1111/ner.12147.

42. Sarà, M.; Pistoia, F.; Mura, E.; Onorati, P.; Govoni, S. Intrathecal Baclofen in Patients With Persistent Vegetative State: 2 Hypotheses. *Archives of Physical Medicine and Rehabilitation* **2009**, *90*, 1245–1249, doi:10.1016/j.apmr.2009.01.012.
43. Formica, F.; Pozzi, M.; Avantaggiato, P.; Molteni, E.; Arrigoni, F.; Giordano, F.; Clementi, E.; Strazzer, S. Disordered Consciousness or Disordered Wakefulness? The Importance of Prolonged Polysomnography for the Diagnosis, Drug Therapy, and Rehabilitation of an Unresponsive Patient with Brain Injury. *Journal of Clinical Sleep Medicine* **2017**, *13*, 1477–1481, doi:10.5664/jcsm.6854.
